# Supplementary material for: Probing the putative α7 nAChR/NMDAR complex in human and murine cortex and hippocampus: Different degrees of complex formation in healthy and Alzheimer brain tissue
Source: PubMed Central journal article supplement (PMC5738045; doi:10.1371/journal.pone.0189513), 2017-12-20

## S2 Fig

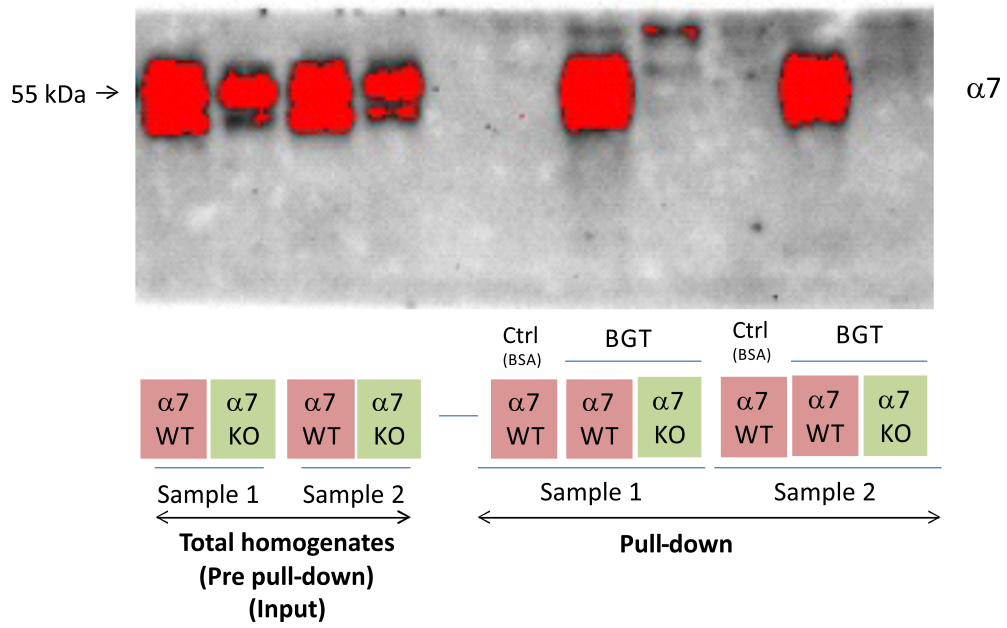

Supplement: pone.0189513.s002.pdf [file pone.0189513.s002.pdf]
